# Supplementary material for: Impact of polystyrene microplastics on Daphnia magna mortality and reproduction in relation to food availability
Source: PeerJ. 2018 Apr 18;6:e4601. doi: 10.7717/peerj.4601 (PMC5911131; doi:10.7717/peerj.4601)
Supplement: Data S2 [file peerj-06-4601-s026.xlsx]

## Sheet: Sheet1
Raw data: Depuration of MPs in adult Daphnia magna at 5 timepoints (15, 30, 60, 120 and 240 min).
Depuration in treatments exposed to MP only				Depuration in treatments exposed to MP with Algae
Replications	Time /min	Number of microplastics in the gut of Daphnia counted under the epi-fluorescent microscope		Time /min	Number of microplastics in the gut of Daphnia counted under the epi-fluorescent microscope
1	15	1946.7		15	401.7
2	15	2193.9		15	401.7
3	15	2224.8		15	339.9
4	15	2286.6		15	432.6
1	30	2039.4		30	401.7
2	30	2224.8		30	339.9
3	30	1977.6		30	370.8
4	30	2317.5		30	463.5
1	60	1730.4		60	463.5
2	60	1823.1		60	339.9
3	60	1823.1		60	401.7
4	60	1575.9		60	370.8
1	120	2410.2		120	339.9
2	120	1606.8		120	339.9
3	120	1884.9		120	339.9
4	120	1699.5		120	309
1	240	1112.4		240	401.7
2	240	1637.7		240	370.8
3	240	1699.5		240	401.7
4	240	1606.8		240	185.4
