# Supplementary material for: Impact of polystyrene microplastics on Daphnia magna mortality and reproduction in relation to food availability
Source: PeerJ. 2018 Apr 18;6:e4601. doi: 10.7717/peerj.4601 (PMC5911131; doi:10.7717/peerj.4601)
Supplement: Data S5 [file peerj-06-4601-s029.xlsx]

## Sheet: Sheet1
Adults daphnia reproduction rate. The data represent the numbers of neonates produced over 21 days per adult daphnia(1 daphnia per beaker).
		Concentration
Replications	Treatments	Algae mg/L	MP mg/L	neonates	Number of parents
1	Algae 100	1.00x10-1	0	22	1
2	Algae 100	1.00x10-1	0	13	1
3	Algae 100	1.00x10-1	0	19	1
4	Algae 100	1.00x10-1	0	24	1
5	Algae 100	1.00x10-1	0	19	1
1	Algae 800	8.00x10-1	0	26	1
2	Algae 800	8.00x10-1	0	37	1
3	Algae 800	8.00x10-1	0	18	1
4	Algae 800	8.00x10-1	0	12	1
5	Algae 800	8.00x10-1	0	26	1
1	Algae=MP 100	1.00x10-1	1.39x10-3	10	1
2	Algae=MP 100	1.00x10-1	1.39x10-3	17	1
3	Algae=MP 100	1.00x10-1	1.39x10-3	14	1
4	Algae=MP 100	1.00x10-1	1.39x10-3	19	1
5	Algae=MP 100	1.00x10-1	1.39x10-3	23	1
1	Algae =MP 800	8.00x10-1	1.11x10-2	13	1
2	Algae =MP 800	8.00x10-1	1.11x10-2	33	1
3	Algae =MP 800	8.00x10-1	1.11x10-2	26	1
4	Algae =MP 800	8.00x10-1	1.11x10-2	31	1
5	Algae =MP 800	8.00x10-1	1.11x10-2	14	1
1	Algae>MP	8.00x10-1	1.39x10-3	19	1
2	Algae>MP	8.00x10-1	1.39x10-3	21	1
3	Algae>MP	8.00x10-1	1.39x10-3	24	1
4	Algae>MP	8.00x10-1	1.39x10-3	29	1
5	Algae>MP	8.00x10-1	1.39x10-3	19	1
1	MP> Algae	1.00x10-1	1.11x10-2	14	1
2	MP> Algae	1.00x10-1	1.11x10-2	17	1
3	MP> Algae	1.00x10-1	1.11x10-2	13	1
4	MP> Algae	1.00x10-1	1.11x10-2	11	1
5	MP> Algae	1.00x10-1	1.11x10-2	11	1
