# Supplementary material for: Impact of polystyrene microplastics on Daphnia magna mortality and reproduction in relation to food availability
Source: PeerJ. 2018 Apr 18;6:e4601. doi: 10.7717/peerj.4601 (PMC5911131; doi:10.7717/peerj.4601)
Supplement: Data S7 [file peerj-06-4601-s031.xlsx]

## Sheet: Sheet1
Data represents the number of reproduction for each treatments over 21 days
	Concentration
Treatments	Algae mg/L	MP mg/L	Total reproduction	Number of Parents in the end of the experiment
Algae (low)	1.00x10-1	0	1	5
Algae (low)	1.00x10-1	0	5	2
Algae (low)	1.00x10-1	0	3	2
Algae (low)	1.00x10-1	0	0	1
Algae (low)	1.00x10-1	0	0	3
Algae (High)	8.00x10-1	0	79	4
Algae (High)	8.00x10-1	0	24	4
Algae (High)	8.00x10-1	0	59	4
Algae (High)	8.00x10-1	0	75	3
Algae (High)	8.00x10-1	0	73	3
Algae=MP(Low)	1.00x10-1	1.39x10-3	0	4
Algae=MP(Low)	1.00x10-1	1.39x10-3	0	2
Algae=MP(Low)	1.00x10-1	1.39x10-3	0	2
Algae=MP(Low)	1.00x10-1	1.39x10-3	0	2
Algae = MP(High)	8.00x10-1	1.11x10-2	33	3
Algae = MP(High)	8.00x10-1	1.11x10-2	40	1
Algae = MP(High)	8.00x10-1	1.11x10-2	83	3
Algae = MP(High)	8.00x10-1	1.11x10-2	53	3
Algae = MP(High)	8.00x10-1	1.11x10-2	69	3
Algae> MP	8.00x10-1	1.39x10-3	146	4
Algae> MP	8.00x10-1	1.39x10-3	112	4
Algae> MP	8.00x10-1	1.39x10-3	66	3
Algae> MP	8.00x10-1	1.39x10-3	70	4
Algae> MP	8.00x10-1	1.39x10-3	89	3
MP>Algae	1.00x10-1	1.11x10-2	18	1
MP>Algae	1.00x10-1	1.11x10-2	24	2
MP>Algae	1.00x10-1	1.11x10-2	0	1
MP>Algae	1.00x10-1	1.11x10-2	6	2
