# Supplementary material for: Impact of polystyrene microplastics on Daphnia magna mortality and reproduction in relation to food availability
Source: PeerJ. 2018 Apr 18;6:e4601. doi: 10.7717/peerj.4601 (PMC5911131; doi:10.7717/peerj.4601)
Supplement: Data S8 [file peerj-06-4601-s032.xlsx]

## Sheet: Sheet1
Data represent the growth rate of daphnia over 21 days
Replications	Time/ Day	Algae 1.00x10-1 mg/L	Algae 8.00x10-1 mg/L	Algae (1.00x10-1 mg/L) = MP(1.39x10-3 mg/L)	Algae (8.00x10-1 mg/L)= MP(1.11x10-2 mg/L)	Algae (8.00x10-1 mg/L) >MP(1.39x10-3 mg/L)	Algae (1.00x10-1 mg/L) < MP(1.11x10-2 mg/L)
1	1	1.3	1.3	1.3	1.3	1.3	1.3
1	2	1.8	2.1	1.8	2.2	2	1.8
2	2	1.7	2	1.9	2.2	2.3	1.9
3	2	2	2.1	2.1	2.1	2	1.8
4	2	1.9	2.1	1.6	2	2.3	2
5	2	2.1	2	2.1	1.8	1.7	1.8
1	4	2	2.8	2.1	2.8	2.7	2.1
2	4	1.8	2.7	2	2.6	2.5	2.1
3	4	2	2.9	2.2	2.3	2.6	2.2
4	4	2	2.9	2.1	2.6	2.5	2
5	4	2	2.7	2.2	2.6	2.5	2
1	6	2	3.2	2.2	3.2	3.3	1.8
2	6	1.8	3.4	2	3.1	3.3	2.3
3	6	2.1	3.4	2.1	3.1	3.1	2.1
4	6	2	3.3	2.2	3.2	3.2	2.4
5	6	2.3	3.3	2.4	3.3	3.2	2
1	8	2.3	3.7	2.3	3.7	3.5	2.5
2	8	2.1	3.6	2.4	3.7	3.8	2.5
3	8	2.1	3.6	2.3	3.4	3.6	2.3
4	8	2.1	3.8	2.3	3.7	3.7	2.5
5	8	2.2	3.6	2.5	3.9	3.9	2.1
1	10	2.6	4	2.2	4	3.7	2.7
2	10	2.2	3.9	2.5	4	3.8	2
3	10	2.3	3.9	2.4	4	3.6	2.7
4	10	2.9	4	2.3	3.5	4	2.6
5	10	2.6	3.9	2.4	4	3.7	2.5
1	12	2.6	4.1	-	4	4.1	2.7
2	12	2.7	4.1	2.6	4	4	2.5
3	12	2	4.2	2.9	3.9	3.7	2.8
4	12	3.2	3.9	2.8	3.9	4.1	2.7
5	12	2.3	4	2.6	3.8	3.8	2.7
1	14	2.3	4.3	2.4	4.2	4.1	2.4
2	14	2.8	3.9	3.2	3.8	4	3.2
3	14	2.7	4.2	-	4.2	4	2.6
4	14	2.7	4.4	-	4	4.2	2.3
5	14	-	4.3	-	4	4.3	-
1	16	2.8	4.1	2.4	3.9	4.1	3.1
2	16	2.6	4.3	-	3.6	4.2	3.3
3	16	2.7	4.6	-	3.6	4.3	3.2
4	16	2.5	4.3	-	4.3	4.3	3.5
5	16	-	4.5	-	4.5	4.2	3
1	18	2.2	4.4	2.3	4.1	4.2	3.2
2	18	2.9	4.4	-	3.5	4.2	3.2
3	18	2.8	0.7	-	3.7	4.2	2.7
4	18	2.4	4.6	-	4.3	4.4	-
5	18	-	4.5	-	4.7	4.2	-
1	20	-	4.4	2.6	4.6	4.2	3
2	20	2.7	4.4	-	4.4	4	3.2
3	20	2.7	4.5	-	4.6	4.4	3.2
4	20	2.6	4.9	-	4.6	4.8	2.4
5	20	-	4.9	-	-	4.5	-
