# Supplementary material for: Impact of polystyrene microplastics on Daphnia magna mortality and reproduction in relation to food availability
Source: PeerJ journal article supplement (doi:10.7717/peerj.4601), 2018-04-18
Supplement: Fig_S17.pdf [file Fig_S17.pdf]

200  $\mu\text{m}$

Midgut

Hindgut

*Daphnia magna* Depuration of MPs after 30 min when exposure to MP and algae

$\mu\text{m}$  scale: 1.000  $\mu\text{m}$  / pixel

10x

Treatment date: Thu 21-Apr-2016 Time: 15:08:40

Microscope model: Axioskop
